# Supplementary material for: A surface-layer protein from Lactobacillus acidophilus NCFM induces autophagic death in HCT116 cells requiring ROS-mediated modulation of mTOR and JNK signaling pathways
Source: Royal Society of Chemistry journal article supplement (doi:10.1039/c9fo00109c), 2019-01-01
Supplement: c9fo00109c1.pdf [file c9fo00109c1.pdf]

## Supplementary Information

### **Surface-layer protein from *Lactobacillus acidophilus* NCFM induces autophagic death in HCT116 cells requiring ROS-mediated modulation of mTOR and JNK signaling pathways**

Huifang Wang <sup>a</sup>, Xian Cheng <sup>b</sup>, Li Zhang <sup>b</sup>, Shichen Xu <sup>b</sup>, Qiuxiang Zhang <sup>a</sup>, Rongrong Lu <sup>\*a</sup>

<sup>a</sup> School of Food Science and Technology, Jiangnan University, 1800 Lihu Avenue, Wuxi, Jiangsu 214122, China.

<sup>b</sup> Jiangsu Institute of Nuclear Medicine, Key Laboratory of Nuclear Medicine, Ministry of Health, 20 Qian Rong, Wuxi, Jiangsu 214063, China

\*Corresponding author

Rongrong Lu

Tel: +86 0510 85329061

Fax: +86 0510 85329061

E-mail: [lurr@jiangnan.edu.cn](mailto:lurr@jiangnan.edu.cn)

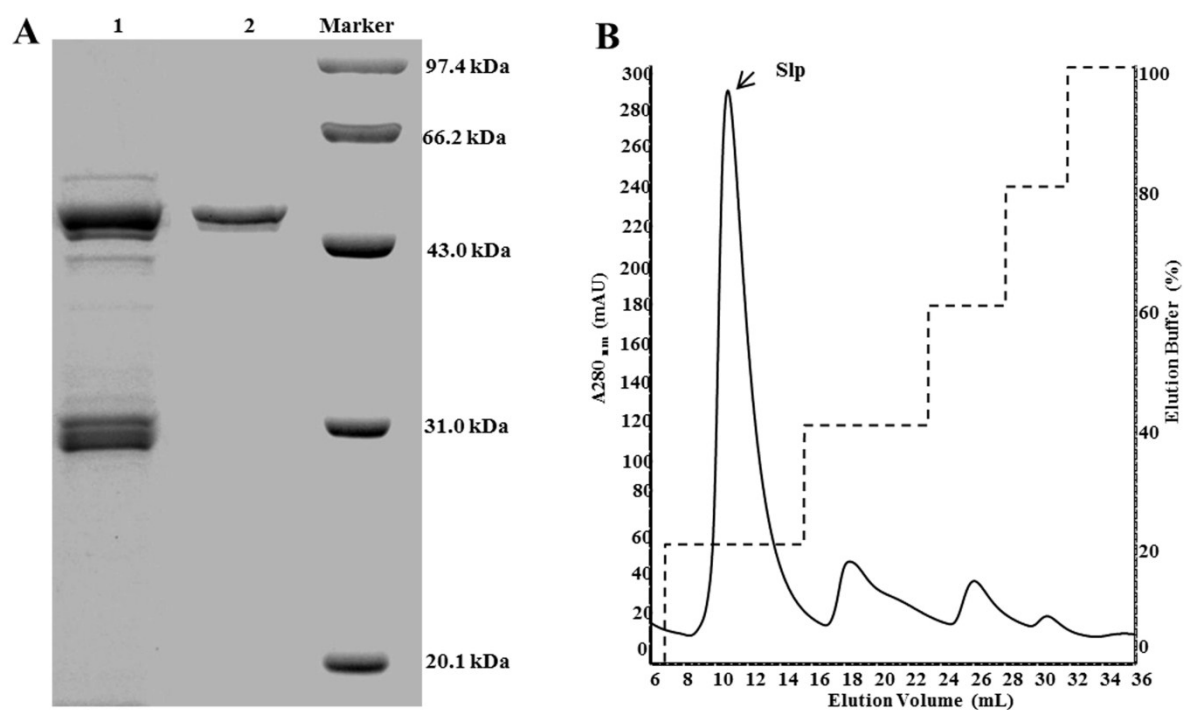

**Fig. S1.** Slp were analyzed by SDS-PAGE and cation exchange chromatography. (A) SDS-PAGE analysis of Slp, line 1 was crude Slp, line 2 was purified Slp. (B) The cation exchange chromatography of Slp.
